# Supplementary material for: Establishment and characterization of six canine hepatocellular carcinoma cell lines
Source: Front Vet Sci. 2024 May 21;11:1392728. doi: 10.3389/fvets.2024.1392728 (PMC11150866; doi:10.3389/fvets.2024.1392728)
Supplement: Supplementary file 2 [file Table_2.xlsx]

## Sheet: Suplementary Table S2. 
Gene Ontology Biological Processes (GO-BP) enrichment analysis
Analysis by ShinyGO 0.80 (FDR cutoff : 0.05, pathway size Min.30-Max.2000), Top20 pathways : selected by FDR
	Fold Enrichment	Enrichment FDR	Pathway	nGenes	Pathway Genes	URL	Genes
Up-regulated by Toceranib	20.098	0.0157423	GO:0046889 positive regulation of lipid biosynthetic process	4	48	http://amigo.geneontology.org/amigo/term/GO:0046889	MLXIPL APOE CD74 NR1H3
	15.8669	0.0157423	GO:0062013 positive regulation of small molecule metabolic process	5	76	http://amigo.geneontology.org/amigo/term/GO:0062013	PMAIP1 MLXIPL APOE CD74 NR1H3
	15.0735	0.0176072	GO:2001243 negative regulation of intrinsic apoptotic signaling pathway	4	64	http://amigo.geneontology.org/amigo/term/GO:2001243	HSPB1 HSF4 NDUFA13 CD74
	12.8627	0.0198485	GO:0060048 cardiac muscle contraction	4	75	http://amigo.geneontology.org/amigo/term/GO:0060048	TCAP STC1 P2RX4 TRPM4
	11.3762	0.0157423	GO:0046890 regulation of lipid biosynthetic process	5	106	http://amigo.geneontology.org/amigo/term/GO:0046890	MLXIPL APOE LPCAT3 CD74 NR1H3
	11.3762	0.0157423	GO:2001242 regulation of intrinsic apoptotic signaling pathway	5	106	http://amigo.geneontology.org/amigo/term/GO:2001242	PMAIP1 HSPB1 HSF4 NDUFA13 CD74
	9.88428	0.0176072	GO:2000116 regulation of cysteine-type endopeptidase activity	5	122	http://amigo.geneontology.org/amigo/term/GO:2000116	PMAIP1 CRYAB HSF4 NDUFA13 USP50
	9.42096	0.0176072	GO:0006575 cellular modified amino acid metabolic process	5	128	http://amigo.geneontology.org/amigo/term/GO:0006575	GSTZ1 PCYOX1L CTSK LPCAT3
	7.77989	0.0176072	GO:0097193 intrinsic apoptotic signaling pathway	6	186	http://amigo.geneontology.org/amigo/term/GO:0097193	PMAIP1 HSPB1 HSF4 NDUFA13 CYP1B1 CD74
	7.23529	0.0176072	GO:0062012 regulation of small molecule metabolic process	6	200	http://amigo.geneontology.org/amigo/term/GO:0062012	PMAIP1 MLXIPL APOE LPCAT3 CD74 NR1H3
	7.03431	0.0157423	GO:2001233 regulation of apoptotic signaling pathway	7	240	http://amigo.geneontology.org/amigo/term/GO:2001233	PMAIP1 G0S2 HSPB1 HSF4 NDUFA13 PAK5 CD74
	6.11679	0.0176072	GO:0044057 regulation of system process	7	276	http://amigo.geneontology.org/amigo/term/GO:0044057	TRPM4 APOE HSF4 STC1 LPCAT3 P2RX4 NR1H3
	5.83491	0.0157423	GO:0097190 apoptotic signaling pathway	9	372	http://amigo.geneontology.org/amigo/term/GO:0097190	PMAIP1 G0S2 HSPB1 HSF4 NDUFA13 CYP1B1 PAK5 P2RX4 CD74
	5.05082	0.0176072	GO:0030162 regulation of proteolysis	8	382	http://amigo.geneontology.org/amigo/term/GO:0030162	PMAIP1 CRYAB APOE HSF4 NDUFA13 USP50 LPCAT3 NR1H3
	3.4303	0.0165019	GO:0065003 protein-containing complex assembly	13	914	http://amigo.geneontology.org/amigo/term/GO:0065003	TRPM4 CORO7 CRYAB RHOC APOE CD74 HSF4 TUBB4A TCAP NDUFA13 USP50 LPCAT3 NDUFB3
	3.28877	0.0198485	GO:0009967 positive regulation of signal transduction	12	880	http://amigo.geneontology.org/amigo/term/GO:0009967	TRPM4 CD74 NR1H3 PMAIP1 CORO7 LAMTOR4 G0S2 ATP6V0C APOE CYP1B1 P2RX4 CDK10
	3.14236	0.0157423	GO:0048584 positive regulation of response to stimulus	16	1228	http://amigo.geneontology.org/amigo/term/GO:0048584	TRPM4 CD74 NR1H3 PMAIP1 CORO7 LAMTOR4 G0S2 ATP6V0C HSPB1 APOE C2 CYP1B1 P2RX4 SLC11A1 CFI CDK10
	2.85529	0.0176072	GO:1901575 organic substance catabolic process	15	1267	http://amigo.geneontology.org/amigo/term/GO:1901575	CEMIP PMAIP1 MLXIPL ATRAID APOE PCYOX1L CLPP NDUFA13 ILVBL CTSK CYP1B1 PNP TIPARP USP50 SLC11A1
	2.79509	0.0204421	GO:0006508 proteolysis	14	1208	http://amigo.geneontology.org/amigo/term/GO:0006508	PMAIP1 CRYAB APOE HSF4 CLPP C2 NDUFA13 DGUOK CTSK USP50 DPP7 LPCAT3 CFI NR1H3
	2.46518	0.0198485	GO:0009966 regulation of signal transduction	18	1761	http://amigo.geneontology.org/amigo/term/GO:0009966	TRPM4 APLP1 CD74 NR1H3 PMAIP1 CORO7 LAMTOR4 G0S2 ATP6V0C HSPB1 APOE HSF4 NDUFA13 DGUOK CYP1B1 PAK5 P2RX4 CDK10
Down-regulated by Toceranib	7.55528	0.000548128	GO:0051091 positive regulation of DNA-binding transcription factor activity	9	165	http://amigo.geneontology.org/amigo/term/GO:0051091	TNFRSF11A PPP3CA FER TNFSF11 EIF2AK2 IL1RAP ERC1 PTEN HIPK2
	5.56076	0.000677178	GO:0051090 regulation of DNA-binding transcription factor activity	11	274	http://amigo.geneontology.org/amigo/term/GO:0051090	TNFRSF11A PPP3CA CHP1 FER TNFSF11 TRAF3 EIF2AK2 IL1RAP ERC1 PTEN HIPK2
	3.64509	0.000142022	GO:0044093 positive regulation of molecular function	22	836	http://amigo.geneontology.org/amigo/term/GO:0044093	TNFRSF11A MET EPB41 PPP3CA CHP1 FER PLAAT4 CFTR TNFSF11 SMAD3 EIF2AK2 IL1RAP NEK7 PIK3CB ERC1 PTEN CASP8 HIPK2 AKT2 RAPGEF6 MAPK14 BCAR3
	3.64509	0.00174381	GO:0035239 tube morphogenesis	15	570	http://amigo.geneontology.org/amigo/term/GO:0035239	QKI LOX SMAD3 HPGD NR3C1 HPSE NDNF PPP3R1 PIK3CB KRAS ARID2 PTEN HIPK2 MET MAPK14
	3.52901	0.000457375	GO:0080134 regulation of response to stress	20	785	http://amigo.geneontology.org/amigo/term/GO:0080134	PPP3CA ERCC8 PLAU PARPBP TNFSF11 ASH1L NSD2 SMAD3 TRAF3 LANCL1 EIF2AK2 HPSE USP25 XIAP ARID2 PTEN HIPK2 TNFRSF11A MET OAS3
	3.31769	0.0026118	GO:0009887 animal organ morphogenesis	16	668	http://amigo.geneontology.org/amigo/term/GO:0009887	MMP13 CFTR TNFSF11 ASH1L NSD2 SMAD3 NR3C1 KRAS ARID2 PTEN HIPK2 MLLT3 MAPK14 BCAR3 TRIP11 PPP3CA
	3.01315	1.52111e-05	GO:0065009 regulation of molecular function	33	1517	http://amigo.geneontology.org/amigo/term/GO:0065009	TNFRSF11A MET EPB41 OAS3 PPP3CA CHP1 FER PPP2R5E PLAAT4 HOMER1 LOX PLAU CFTR TNFSF11 NSD1 SMAD3 TRAF3 LATS1 EIF2AK2 PPP3R1 IL1RAP NEK7 XIAP PIK3CB ERC1 PTEN CASP8 HIPK2 AKT2 RAPGEF6 MAPK14 TIMP3 BCAR3
	2.90588	0.00117981	GO:0048585 negative regulation of response to stimulus	21	1001	http://amigo.geneontology.org/amigo/term/GO:0048585	MET MLLT3 CHP1 FER HTR1B PLAU PARPBP ASH1L LITAF SMAD3 LATS1 USP25 XIAP PIK3CB PTEN CASP8 HIPK2 MAPK14 TIMP3 SOX13 OAS3
	2.90507	0.000513427	GO:0009888 tissue development	25	1192	http://amigo.geneontology.org/amigo/term/GO:0009888	MET MAPK14 MMP13 UGCG PLAAT4 HOMER1 LOX CFTR TNFSF11 DSG3 ASH1L KLF15 SMAD3 LATS1 NR3C1 HPSE PPP3R1 KRAS PLK4 ARID2 PTEN MLLT3 FAM172A TRIP11 PPP3CA
	2.74703	0.000513427	GO:0071310 cellular response to organic substance	26	1311	http://amigo.geneontology.org/amigo/term/GO:0071310	AKT2 MAPK14 TIMP3 FER UGCG LOX HTR1B CFTR TNFSF11 LITAF SMAD3 TRAF3 HPGD LATS1 EIF2AK2 NR3C1 PTPN12 NDNF IL1RAP XIAP PIK3CB HIPK2 TNFRSF11A RAB31 BCAR3 OAS3
	2.72284	0.000154806	GO:0010033 response to organic substance	31	1577	http://amigo.geneontology.org/amigo/term/GO:0010033	AKT2 MAPK14 TIMP3 FER UGCG HOMER1 LOX HTR1B CFTR TNFSF11 KLF15 LITAF SMAD3 TRAF3 HPGD LATS1 EIF2AK2 NR3C1 HPSE PTPN12 NDNF USP25 IL1RAP XIAP PIK3CB CASP8 HIPK2 TNFRSF11A RAB31 BCAR3 OAS3
	2.66159	0.00117981	GO:0048468 cell development	24	1249	http://amigo.geneontology.org/amigo/term/GO:0048468	MET FER QKI UGCG HOOK1 HOMER1 LOX CFTR B4GALT6 TNFSF11 SLC35A3 SMAD3 LATS1 SPAG16 HPSE NDNF PPP3R1 KRAS DCLK1 PTEN AKT2 FAM172A TRIP11 PPP3CA
	2.59154	0.000513427	GO:0035556 intracellular signal transduction	29	1550	http://amigo.geneontology.org/amigo/term/GO:0035556	MET MAPK14 PPP3CA CHP1 LOX RAPGEF6 TNFSF11 ASH1L LITAF PIK3CA BCAR3 SMAD3 LATS1 EIF2AK2 HPSE NDNF PPP3R1 STK38L XIAP PIK3CB NRAS KRAS ERC1 PTEN CASP8 HIPK2 TNFRSF11A TIMP3 OAS3
	2.51843	0.000548128	GO:0007166 cell surface receptor signaling pathway	29	1595	http://amigo.geneontology.org/amigo/term/GO:0007166	AKT2 MET MAPK14 MLLT3 FER UGCG HOMER1 LOX TNFSF11 FAM83B KLF15 SMAD3 TRAF3 HPGD LATS1 PTPN12 IL1RAP XIAP PIK3CB EFNB2 PTEN CASP8 HIPK2 PPP3CA TNFRSF11A TIMP3 BCAR3 SOX13 OAS3
	2.50477	0.000513427	GO:0009653 anatomical structure morphogenesis	30	1659	http://amigo.geneontology.org/amigo/term/GO:0009653	MET FER MMP13 QKI LOX CFTR B4GALT6 TNFSF11 ASH1L NSD2 SLC35A3 PALM SMAD3 HPGD LATS1 NR3C1 HPSE NDNF PPP3R1 PIK3CB KRAS ARID2 PTEN HIPK2 MAPK14 MLLT3 EPB41 BCAR3 TRIP11 PPP3CA
	2.49574	0.000513427	GO:0070887 cellular response to chemical stimulus	30	1665	http://amigo.geneontology.org/amigo/term/GO:0070887	AKT2 MAPK14 TIMP3 FER UGCG LOX HTR1B CFTR TNFSF11 LITAF SMAD3 TRAF3 HPGD LANCL1 LATS1 EIF2AK2 NR3C1 PTPN12 NDNF IL1RAP NEK7 XIAP PIK3CB PTEN HIPK2 TNFRSF11A RAB31 MET BCAR3 OAS3
	2.35969	0.000945989	GO:0009966 regulation of signal transduction	30	1761	http://amigo.geneontology.org/amigo/term/GO:0009966	MET MLLT3 CHP1 FER UGCG HOMER1 LOX HTR1B PLAU TNFSF11 ASH1L KLF15 LITAF SMAD3 LATS1 EIF2AK2 HPSE PTPN12 XIAP PIK3CB KRAS PTEN CASP8 HIPK2 TNFRSF11A MAPK14 TIMP3 BCAR3 SOX13 OAS3
	2.31675	0.000551399	GO:0010646 regulation of cell communication	33	1973	http://amigo.geneontology.org/amigo/term/GO:0010646	MET MLLT3 CHP1 FER UGCG HOMER1 LOX HTR1B PLAU CFTR TNFSF11 ASH1L KLF15 LITAF SMAD3 LATS1 EIF2AK2 HPSE PTPN12 PPP3R1 XIAP PIK3CB KRAS PTEN CASP8 HIPK2 TNFRSF11A MAPK14 TIMP3 BCAR3 SOX13 OAS3 PPP3CA
	2.3039	0.000573732	GO:0023051 regulation of signaling	33	1984	http://amigo.geneontology.org/amigo/term/GO:0023051	MET MLLT3 CHP1 FER UGCG HOMER1 LOX HTR1B PLAU CFTR TNFSF11 ASH1L KLF15 LITAF SMAD3 LATS1 EIF2AK2 HPSE PTPN12 PPP3R1 XIAP PIK3CB KRAS PTEN CASP8 HIPK2 TNFRSF11A MAPK14 TIMP3 BCAR3 SOX13 OAS3 PPP3CA
	2.20563	0.0026118	GO:0051173 positive regulation of nitrogen compound metabolic process	30	1884	http://amigo.geneontology.org/amigo/term/GO:0051173	AKT2 MET MLLT3 KLF12 PPP3CA NFIX BIRC3 TNFSF11 NSD1 ASH1L KLF15 LITAF NSD2 SMAD3 PATL1 TMTC3 LATS1 NR3C1 PPP3R1 NEK7 XIAP KRAS ARID2 PTEN TCF12 CASP8 HIPK2 TNFRSF11A MAPK14 BCAR3
Up-regulated by Sorafenib	5.58203	0.000198558	GO:0006888 endoplasmic reticulum to Golgi vesicle-mediated transport	12	65	http://amigo.geneontology.org/amigo/term/GO:0006888	HYOU1 SEC24D LMAN1 ERGIC1 SEC23A SAR1A SEC13 SEC24A GOLT1B SEC31A RINT1 SEC23B
	4.10612	6.82399e-06	GO:0048193 Golgi vesicle transport	22	162	http://amigo.geneontology.org/amigo/term/GO:0048193	HYOU1 BLZF1 SEC24D LMAN1 ERGIC1 SEC23A SAR1A RAB6A SEC13 SEC24A GOLT1B RAB26 COPZ2 SEC31A GOLGA5 KDELR3 COG6 PREPL DOP1B RINT1 SEC23B RAB31
	2.35132	4.4078e-08	GO:0046907 intracellular transport	71	913	http://amigo.geneontology.org/amigo/term/GO:0046907	NDEL1 HYOU1 XPOT SPAG9 SEC61A1 PPP3CA UAP1 SEC24D LMAN1 ERGIC1 SERAC1 YOD1 SRP54 CRYAB IGF2R NEMF DAB2 LYST SEC23A HERPUD1 SAR1A WASHC4 AP3M2 NUS1 UCP2 UBR5 RAB6A SEC13 SLC25A30 TRAM2 XPO5 PEX12 KIF5B HSF4 TMEM87B GCLC ZMPSTE24 SYTL1 SNX10 FAF2 PEX1 SEC24A DENND5A PRNP GOLT1B RHBDD1 IFT20 SNX16 XPO1 WDR35 SEC31A COPG1 COPB1 LAMP2 HIF1A APPL1 TRAM1 PREPL NAPB DOP1B RINT1 MYO19 M6PR SEC23B SLC35A2 …
	2.32585	0.00020791	GO:0006886 intracellular protein transport	38	494	http://amigo.geneontology.org/amigo/term/GO:0006886	SEC61A1 PPP3CA UAP1 YOD1 SRP54 SEC23A HERPUD1 SAR1A AP3M2 UBR5 SEC13 TRAM2 XPO5 PEX12 XPOT SYTL1 SNX10 FAF2 PEX1 SEC24A PRNP RHBDD1 SNX16 XPO1 COPG1 COPB1 LAMP2 APPL1 TRAM1 NAPB M6PR SEC23B SEC24D SLC35A2 NDEL1 ZFYVE16 SEL1L MED1
	2.1853	3.50504e-06	GO:0045184 establishment of protein localization	61	844	http://amigo.geneontology.org/amigo/term/GO:0045184	BLZF1 SEC61A1 PPP3CA UAP1 STEAP3 SEC61A2 YOD1 SRP54 SEC23A HERPUD1 SAR1A AP3M2 UBR5 SEC13 TRAM2 XPO5 NR1D1 PEX12 XPOT SYTL1 SNX10 IL1RN DDIT3 FAF2 PEX1 PTP4A3 SEC24A PRNP RHBDD1 IFT20 SNX16 KTN1 RAB26 XPO1 MDM2 RHBDF2 RALA COPG1 HPSE COPB1 LAMP2 SLC7A11 HIF1A APPL1 TRAM1 GORASP2 PREPL NAPB M6PR SEC23B SEC24D SLC35A2 NDEL1 RAB31 ZFYVE16 PPP3CB RAB3GAP1 SEL1L MED1 SNAP25 CCDC186
	2.17383	1.55763e-05	GO:0015031 protein transport	55	765	http://amigo.geneontology.org/amigo/term/GO:0015031	BLZF1 SEC61A1 PPP3CA UAP1 STEAP3 SEC61A2 YOD1 SRP54 SEC23A HERPUD1 SAR1A AP3M2 UBR5 SEC13 TRAM2 XPO5 NR1D1 PEX12 XPOT SYTL1 SNX10 IL1RN FAF2 PEX1 SEC24A PRNP RHBDD1 IFT20 SNX16 KTN1 RAB26 XPO1 RHBDF2 COPG1 HPSE COPB1 LAMP2 SLC7A11 HIF1A APPL1 TRAM1 PREPL NAPB M6PR SEC23B SEC24D SLC35A2 NDEL1 RAB31 ZFYVE16 PPP3CB SEL1L MED1 SNAP25 CCDC186
	2.10504	0.000375551	GO:0030163 protein catabolic process	44	632	http://amigo.geneontology.org/amigo/term/GO:0030163	FBXL5 RNF165 CSNK1A1 KCTD13 YOD1 KLHDC2 NEMF DAB2 HERPUD1 USP33 USP10 ATRAID RNF41 HACE1 ERCC8 DNAJC3 NR1D1 GCLC ZMPSTE24 FEM1C DDIT3 FAF2 VPS37A NRG1 RHBDD1 RAB26 XPO1 MDM2 USP13 PIAS1 UBE2H HPSE LAMP2 TIPARP MDM4 FBXW8 SYVN1 MFSD8 NGLY1 MARCHF7 RLIM HIPK2 TPP1 SEL1L
	2.08524	1.91042e-06	GO:0071705 nitrogen compound transport	72	1044	http://amigo.geneontology.org/amigo/term/GO:0071705	BLZF1 SLC36A1 XPOT SEC61A1 ABCC5 PPP3CA UAP1 STEAP3 SEC61A2 YOD1 SRP54 SLC19A2 SEC23A HERPUD1 SLC7A5 SAR1A SLC35A1 AP3M2 UBR5 SEC13 ABCC4 TRAM2 XPO5 NR1D1 PEX12 SLC44A1 SYTL1 SNX10 IL1RN FAF2 PEX1 SEC24A PRNP SLC43A2 SLC35B4 RHBDD1 IFT20 SNX16 KTN1 RAB26 SLC25A38 XPO1 RHBDF2 SLC17A9 FFAR4 SLC25A17 COPG1 HPSE COPB1 SLC33A1 LAMP2 SLC7A1 SLC7A11 HIF1A APPL1 SLC48A1 TRAM1 PREPL NAPB M6PR SLC25A33 SEC…
	2.02323	0.000134625	GO:1901565 organonitrogen compound catabolic process	54	807	http://amigo.geneontology.org/amigo/term/GO:1901565	FBXL5 RNF165 CSNK1A1 CD44 BCAT2 KCTD13 YOD1 KLHDC2 NEMF DAB2 HERPUD1 BLVRB USP33 SGPL1 USP10 ATRAID RNF41 HACE1 SMPD1 ERCC8 DNAJC3 NR1D1 GCLC ZMPSTE24 FEM1C BLVRA DDIT3 FAF2 DBT VPS37A NRG1 RHBDD1 RAB26 XPO1 MDM2 USP13 PIAS1 UBE2H GCSH HPSE HYAL3 LAMP2 TIPARP MDM4 FBXW8 SYVN1 MFSD8 NGLY1 MARCHF7 RLIM HIPK2 TPP1 SEL1L ACER2
	1.99587	1.55763e-05	GO:0034613 cellular protein localization	67	1015	http://amigo.geneontology.org/amigo/term/GO:0034613	BLZF1 SEC61A1 PPP3CA UAP1 YOD1 SRP54 DAB2 SRGN SEC23A HERPUD1 SAR1A AP3M2 UBR5 RAB6A SEC13 TRAM2 XPO5 PEX12 KIF5B SESN2 WNT11 XPOT SYTL1 SNX10 KDELR2 ITGA3 DDIT3 FAF2 PEX1 SEC24A PRNP RHBDD1 IFT20 SNX16 RAB26 XPO1 MDM2 RHBDF2 WDR35 RALA COPG1 COPB1 LAMP2 SLC7A11 APPL1 KDELR3 TRAM1 GORASP2 PREPL NAPB M6PR SEC23B SEC24D DLG1 SLC35A2 NDEL1 RAB31 ZFYVE16 FAM149B1 EPB41 RAB3GAP1 TPP1 SEL1L MED1 SNAP25…
	1.98609	1.58199e-05	GO:0070727 cellular macromolecule localization	67	1020	http://amigo.geneontology.org/amigo/term/GO:0070727	BLZF1 SEC61A1 PPP3CA UAP1 YOD1 SRP54 DAB2 SRGN SEC23A HERPUD1 SAR1A AP3M2 UBR5 RAB6A SEC13 TRAM2 XPO5 PEX12 KIF5B SESN2 WNT11 XPOT SYTL1 SNX10 KDELR2 ITGA3 DDIT3 FAF2 PEX1 SEC24A PRNP RHBDD1 IFT20 SNX16 RAB26 XPO1 MDM2 RHBDF2 WDR35 RALA COPG1 COPB1 LAMP2 SLC7A11 APPL1 KDELR3 TRAM1 GORASP2 PREPL NAPB M6PR SEC23B SEC24D DLG1 SLC35A2 NDEL1 RAB31 ZFYVE16 FAM149B1 EPB41 RAB3GAP1 TPP1 SEL1L MED1 SNAP25…
	1.96886	1.91042e-06	GO:0071702 organic substance transport	84	1290	http://amigo.geneontology.org/amigo/term/GO:0071702	BLZF1 SLC36A1 XPOT SEC61A1 ABCC5 PPP3CA UAP1 STEAP3 SEC61A2 FGF21 SERAC1 YOD1 SRP54 SLC19A2 SEC23A HERPUD1 SLC7A5 SAR1A SLC35A1 AP3M2 NUS1 UBR5 SEC13 ABCC4 TRAM2 XPO5 NR1D1 PEX12 SESN2 SLC44A1 SYTL1 SNX10 KLF15 IL1RN FAF2 PEX1 SEC24A PRNP SLC43A2 SLC35B4 RHBDD1 IFT20 SNX16 KTN1 RAB26 SLC25A38 XPO1 RHBDF2 SLC17A9 INHBA FFAR4 SLC25A17 SLC2A10 COPG1 PLSCR4 PLSCR1 AQP3 HPSE COPB1 SLC33A1 SELENOM LAMP…
	1.95451	1.91042e-06	GO:0051649 establishment of localization in cell	83	1284	http://amigo.geneontology.org/amigo/term/GO:0051649	NDEL1 HYOU1 PPP3CB XPOT SPAG9 SEC61A1 SNAP25 PPP3CA NAPB UAP1 SEC24D LMAN1 ERGIC1 SERAC1 YOD1 SRP54 CRYAB IGF2R NEMF DAB2 LYST SEC23A HERPUD1 SAR1A WASHC4 AP3M2 NUS1 UCP2 UBR5 RAB6A SEC13 SLC25A30 TRAM2 XPO5 NR1D1 PEX12 KIF5B HSF4 TMEM87B GCLC ZMPSTE24 SYTL1 SNX10 DDIT3 FAF2 PEX1 SEC24A DENND5A PRNP GOLT1B GEM RHBDD1 IFT20 SNX16 XPO1 WDR35 SEC31A COPG1 COPB1 LAMP2 RAB3A HIF1A APPL1 TRAM1 PREPL P2…
	1.78266	2.3444e-06	GO:0051641 cellular localization	103	1747	http://amigo.geneontology.org/amigo/term/GO:0051641	NDEL1 HYOU1 BLZF1 PPP3CB XPOT SPAG9 SEC61A1 SNAP25 PPP3CA NAPB UAP1 SEC24D LMAN1 ERGIC1 SERAC1 YOD1 SRP54 CRYAB IGF2R NEMF DAB2 LYST SRGN SEC23A HERPUD1 SAR1A WASHC4 AP3M2 NUS1 UCP2 UBR5 RAB6A SEC13 SLC25A30 TRAM2 XPO5 NR1D1 PEX12 KIF5B HSF4 TMEM87B GCLC ZMPSTE24 SESN2 WNT11 SYTL1 SNX10 KDELR2 ITGA3 DDIT3 FAF2 PEX1 SEC24A DENND5A PRNP GOLT1B GEM RHBDD1 IFT20 SNX16 RAB26 XPO1 MDM2 RHBDF2 WDR35 RAL…
	1.75027	0.000132474	GO:0008104 protein localization	80	1382	http://amigo.geneontology.org/amigo/term/GO:0008104	BLZF1 ZDHHC18 SEC61A1 PPP3CA DVL3 UAP1 STEAP3 SEC61A2 YOD1 SRP54 DAB2 SRGN SEC23A HERPUD1 SAR1A AP3M2 UBR5 RAB6A SEC13 TRAM2 XPO5 NR1D1 PEX12 KIF5B SESN2 WNT11 XPOT SYTL1 SNX10 KDELR2 ITGA3 IL1RN DDIT3 FAF2 PEX1 PTP4A3 SEC24A PRNP RHBDD1 IFT20 SNX16 KTN1 RAB26 XPO1 MDM2 RHBDF2 WDR35 RALA COPG1 HPSE COPB1 LAMP2 SLC7A11 HIF1A APPL1 KDELR3 TRAM1 GORASP2 PREPL NAPB M6PR EP400 SEC23B SEC24D DLG1 SLC35…
	1.74209	0.000336795	GO:1901575 organic substance catabolic process	73	1267	http://amigo.geneontology.org/amigo/term/GO:1901575	FBXL5 RNF165 CSNK1A1 CD44 PABPC1 BCAT2 KCTD13 YOD1 KLHDC2 NEMF DAB2 HERPUD1 BLVRB USP33 ABHD2 SGPL1 SAMD4A USP10 CNOT8 ATRAID RNF41 HACE1 SMPD1 ERCC8 UPP1 DNAJC3 NR1D1 ACOX3 GCLC ZMPSTE24 SESN2 FEM1C BLVRA DDIT3 FAF2 PPP1R3B DBT AGL TTC37 VPS37A NRG1 RHBDD1 RAB26 XPO1 MDM2 USP13 CTIF GNPDA1 HPGD PIAS1 SLC25A17 UBE2H GCSH CYP1B1 HPSE HYAL3 LAMP2 TIPARP HIF1A MDM4 PLCB1 FBXW8 SYVN1 MFSD8 ENO2 NGLY1…
	1.66806	0.000215689	GO:0010033 response to organic substance	87	1577	http://amigo.geneontology.org/amigo/term/GO:0010033	TRPM4 NDEL1 CORO1A MED1 ACER2 ATF1 CD44 SLC39A14 BCAT2 FGF21 VASN YOD1 HAVCR2 DAB2 HERPUD1 ABHD2 USP10 ABL2 NUS1 SMPD1 UBR5 LOX NR1D1 KIF5B HSF4 GCLC SESN2 ITGA3 KLF15 IL1RN DDIT3 FAF2 PTP4A3 PRNP RIOK3 RHBDD1 MDM2 ST3GAL6 TRAF3 USP13 RNF14 WDR35 CEP57 HPGD SLC2A10 CYP1B1 PLSCR4 HPSE ANXA5 PTPN12 SLC7A11 TIPARP HIF1A APPL1 JAG1 IL1RAP ADAM17 CDC42EP2 XIAP ITPR2 SPATA2 PLCB1 FBXW8 SSH1 SYVN1 TRAM1…
	1.66493	0.000440096	GO:0009056 catabolic process	81	1471	http://amigo.geneontology.org/amigo/term/GO:0009056	FBXL5 RNF165 CSNK1A1 CD44 PABPC1 BCAT2 KCTD13 YOD1 KLHDC2 NEMF DAB2 HERPUD1 BLVRB USP33 ABHD2 SGPL1 SAMD4A USP10 CNOT8 ATG4C ATG12 FBXL4 ATRAID RNF41 HACE1 SMPD1 SPTLC2 ERCC8 UPP1 DNAJC3 NR1D1 ACOX3 GCLC ZMPSTE24 SESN2 FEM1C BLVRA DDIT3 FAF2 PPP1R3B DBT AGL TTC37 VPS37A NRG1 RHBDD1 IFT20 RAB26 XPO1 MDM2 TMEM39A USP13 CTIF GNPDA1 HPGD PIAS1 SLC25A17 UBE2H GCSH CYP1B1 HPSE HYAL3 LAMP2 TIPARP HIF1A …
	1.60911	0.000131861	GO:0010646 regulation of cell communication	105	1973	http://amigo.geneontology.org/amigo/term/GO:0010646	TRPM4 HYOU1 IL11 BEND6 SPAG9 CD44 FGF21 CHSY1 KCTD13 VASN PRRX1 DIXDC1 HAVCR2 DAB2 OTUD3 SRGN HERPUD1 USP33 USP10 DDIT4 RNF41 SMPD1 RRM2B UBR5 SEC13 LOX MAP3K7 FNIP1 PLAU NR1D1 KIF5B HSF4 GCLC ZMPSTE24 SESN2 WNT11 ESM1 PWP1 ITGA3 KLF15 IL1RN DDIT3 PTP4A3 PRNP DLC1 NRG1 RIOK3 IFT20 RAB26 MDM2 CHN1 RNF14 DGKE S1PR2 KITLG INHBA RASA1 FFAR4 SLC2A10 CYP1B1 SLC39A10 HPSE GPAT3 PTPN12 NR2C1 MIOS SLC7A11…
	1.60019	0.000134625	GO:0023051 regulation of signaling	105	1984	http://amigo.geneontology.org/amigo/term/GO:0023051	TRPM4 HYOU1 IL11 BEND6 SPAG9 CD44 FGF21 CHSY1 KCTD13 VASN PRRX1 DIXDC1 HAVCR2 DAB2 OTUD3 SRGN HERPUD1 USP33 USP10 DDIT4 RNF41 SMPD1 RRM2B UBR5 SEC13 LOX MAP3K7 FNIP1 PLAU NR1D1 KIF5B HSF4 GCLC ZMPSTE24 SESN2 WNT11 ESM1 PWP1 ITGA3 KLF15 IL1RN DDIT3 PTP4A3 PRNP DLC1 NRG1 RIOK3 IFT20 RAB26 MDM2 CHN1 RNF14 DGKE S1PR2 KITLG INHBA RASA1 FFAR4 SLC2A10 CYP1B1 SLC39A10 HPSE GPAT3 PTPN12 NR2C1 MIOS SLC7A11…
Down-regulated by Soceranib	5.18573	2.15513e-06	GO:0033044 regulation of chromosome organization	19	145	http://amigo.geneontology.org/amigo/term/GO:0033044	BUB1 FBXO5 XRCC1 PLK1 EXOSC10 NCAPH CDK2 PPP1R10 ANAPC15 FEN1 RMI2 HNRNPA1 HNRNPD INO80B AURKB AXIN2 NCAPD2 TOP2A TTK
	5.17523	7.02072e-06	GO:0000819 sister chromatid segregation	17	130	http://amigo.geneontology.org/amigo/term/GO:0000819	BUB1 FBXO5 PLK1 CHMP1A NDC80 PSRC1 NCAPH VPS4A ANAPC15 FEN1 RMI2 KIFC1 AURKB AXIN2 NCAPD2 CDCA8 TTK
	4.67708	8.13021e-08	GO:0007059 chromosome segregation	26	220	http://amigo.geneontology.org/amigo/term/GO:0007059	TOP2A BUB1 FBXO5 CENPW PLK1 CHMP1A NDC80 PSRC1 NCAPH CENPT SIRT7 TTK VPS4A RCC1 ANAPC15 FEN1 RMI2 SKA3 KIFC1 HJURP DSN1 IVD AURKB AXIN2 NCAPD2 CDCA8
	3.11157	4.05693e-06	GO:0008610 lipid biosynthetic process	32	407	http://amigo.geneontology.org/amigo/term/GO:0008610	SPTLC3 TM7SF2 LPIN1 ZBTB45 MLXIPL MBOAT7 DEGS2 IMPA2 MSMO1 ACLY HMGCR FDPS SQLE HMGN2 PGAP3 INSIG1 SC5D DHCR24 MLYCD FDFT1 GAL3ST1 B3GALT4 NSDHL ISYNA1 EDN1 EGR1 MVK ABCD1 LPCAT3 HSD17B7 IP6K2 ELOVL6
	3.02211	1.59494e-07	GO:0051276 chromosome organization	42	550	http://amigo.geneontology.org/amigo/term/GO:0051276	CTCF TOP2A BUB1 YWHAB FBXO5 XRCC1 CENPW PLK1 ZBTB1 CHMP1A HSPA2 NDC80 EXOSC10 PSRC1 DHX9 H1-0 NCAPH CDK2 CENPT PPP1R10 SMARCE1 SMARCC1 SIRT7 VPS4A ANAPC15 FEN1 ARID1A RMI2 H1-5 HNRNPA1 HNRNPD INO80B KIFC1 ASF1B HJURP H1-4 AURKB AXIN2 RAD51 NCAPD2 CDCA8 TTK
	2.76107	8.39954e-06	GO:0000278 mitotic cell cycle	36	516	http://amigo.geneontology.org/amigo/term/GO:0000278	FBXO5 CENPW WDR62 TAOK2 PLK1 MEPCE CHMP1A HSPA2 NDC80 PSRC1 ZFP36L1 NCAPH CDK2 CENPT PPP1R10 BUB1 SIRT7 TTK VPS4A RCC1 ANAPC15 XRCC2 UBE2C E2F8 CKS2 EDN1 KIFC1 CDKN2C FOXM1 CTDSP1 AURKB RAD51 NCAPD2 CIT CDCA8 SKA3
	2.6917	9.63715e-06	GO:0006974 cellular response to DNA damage stimulus	37	544	http://amigo.geneontology.org/amigo/term/GO:0006974	TOP2A FBXO5 XRCC1 H2AX TAOK2 GTF2H5 TNFRSF1B PLK1 LIG1 ZBTB1 DHX9 BCLAF1 PPP1R10 FOXP1 SIRT7 DDX39B XRCC2 ENDOV RMI2 NUPR2 AUNIP HDGFL2 YEATS4 MCL1 NEIL1 PCLAF DTX3L TRAIP RHNO1 CRIP1 FOXM1 UNG AXIN2 RAD51 RAD51AP1 BAD NPAS2
	2.61806	3.246e-06	GO:0051726 regulation of cell cycle	43	650	http://amigo.geneontology.org/amigo/term/GO:0051726	BUB1 FBXO5 H2AX TAOK2 PLK1 MEPCE CHMP1A HSPA2 TGFB1 PSRC1 ZFP36L1 CDKN3 PPP1R10 TTK VPS4A RCC1 DDX39B ANAPC15 FEN1 TRIM21 CIRBP RMI2 NUPR2 MNT UBE2C JUNB YEATS4 SMIM22 E2F8 INO80B EDN1 PCLAF CDKN2C RHNO1 FOXM1 NR4A1 CTDSP1 IVD AURKB AXIN2 MX1 RAD51AP1 CIT
	2.5546	3.94566e-08	GO:0007049 cell cycle	61	945	http://amigo.geneontology.org/amigo/term/GO:0007049	BUB1 FBXO5 CENPW WDR62 H2AX TAOK2 PLK1 MEPCE CHMP1A HSPA2 TGFB1 NDC80 PSRC1 ZFP36L1 CDKN3 NCAPH CDK2 CENPT PPP1R10 SIRT7 TTK VPS4A RCC1 DDX39B ANAPC15 FEN1 XRCC2 TRIM21 CIRBP RMI2 NUPR2 AUNIP MNT UBE2C JUNB YEATS4 SMIM22 E2F8 INO80B CKS2 EDN1 KIFC1 PCLAF CDKN2C RHNO1 FOXM1 NR4A1 CTDSP1 IVD AURKB ODF2 AXIN2 RAD51 NCAPD2 CIT WDR6 MX1 RAD51AP1 CDCA8 TOP2A SKA3
	2.52842	3.246e-06	GO:0022402 cell cycle process	46	720	http://amigo.geneontology.org/amigo/term/GO:0022402	BUB1 FBXO5 WDR62 H2AX TAOK2 PLK1 MEPCE CHMP1A HSPA2 NDC80 PSRC1 ZFP36L1 NCAPH CDK2 PPP1R10 SIRT7 TTK VPS4A RCC1 DDX39B ANAPC15 FEN1 XRCC2 CIRBP RMI2 AUNIP UBE2C E2F8 CKS2 EDN1 KIFC1 CDKN2C RHNO1 FOXM1 CTDSP1 IVD AURKB ODF2 AXIN2 RAD51 NCAPD2 CIT WDR6 RAD51AP1 CDCA8 TOP2A
	2.17933	4.666e-07	GO:0045935 positive regulation of nucleobase-containing compound metabolic process	69	1253	http://amigo.geneontology.org/amigo/term/GO:0045935	SIX5 CTCF STAT6 NPAS2 TEAD2 XRCC1 BCL10 TNFRSF1B MEPCE NFKBIA EXOSC5 TGFB1 DCAF6 PSRC1 KLF6 MLXIPL SERTAD1 ZFP36L1 DYRK1B DHX9 FOSB CDK2 PPP1R10 HNF1B SMARCC1 ZNF395 PBX3 ILK SIRT7 HMGN3 DDX39B ETV4 NFIB ENY2 RHOG ARID1A HDGFL2 RFXANK FOS SREBF2 JUNB CREB3L4 YEATS4 HNRNPA1 HNRNPD E2F8 INO80B MRTFA DVL2 ING1 MLLT11 EDN1 EGR1 DTX3L FOXM1 PDX1 RASL11A STAT1 LEO1 NR4A1 RFC5 RAD51 IER2 RAD51AP1 THRAP3…
	2.14968	4.05693e-06	GO:0051254 positive regulation of RNA metabolic process	61	1123	http://amigo.geneontology.org/amigo/term/GO:0051254	SIX5 CTCF STAT6 NPAS2 TEAD2 BCL10 TNFRSF1B MEPCE NFKBIA EXOSC5 TGFB1 DCAF6 PSRC1 KLF6 MLXIPL SERTAD1 ZFP36L1 DYRK1B DHX9 FOSB CDK2 HNF1B SMARCC1 ZNF395 PBX3 ILK SIRT7 HMGN3 DDX39B ETV4 NFIB ENY2 RHOG ARID1A RFXANK FOS SREBF2 JUNB CREB3L4 HNRNPD E2F8 INO80B MRTFA DVL2 ING1 MLLT11 EDN1 EGR1 DTX3L FOXM1 PDX1 RASL11A STAT1 LEO1 NR4A1 IER2 THRAP3 RARB BCLAF1 TOP2A ISYNA1
	2.13714	1.03782e-05	GO:0045893 positive regulation of transcription DNA-templated	56	1037	http://amigo.geneontology.org/amigo/term/GO:0045893	SIX5 CTCF STAT6 NPAS2 TEAD2 BCL10 MEPCE NFKBIA TGFB1 DCAF6 PSRC1 KLF6 MLXIPL SERTAD1 DYRK1B DHX9 FOSB CDK2 HNF1B SMARCC1 ZNF395 PBX3 ILK SIRT7 HMGN3 DDX39B ETV4 NFIB ENY2 RHOG ARID1A RFXANK FOS SREBF2 JUNB CREB3L4 E2F8 INO80B MRTFA DVL2 ING1 MLLT11 EDN1 EGR1 DTX3L FOXM1 PDX1 RASL11A STAT1 NR4A1 IER2 THRAP3 RARB BCLAF1 TOP2A ISYNA1
	2.13714	1.03782e-05	GO:1903508 positive regulation of nucleic acid-templated transcription	56	1037	http://amigo.geneontology.org/amigo/term/GO:1903508	SIX5 CTCF STAT6 NPAS2 TEAD2 BCL10 MEPCE NFKBIA TGFB1 DCAF6 PSRC1 KLF6 MLXIPL SERTAD1 DYRK1B DHX9 FOSB CDK2 HNF1B SMARCC1 ZNF395 PBX3 ILK SIRT7 HMGN3 DDX39B ETV4 NFIB ENY2 RHOG ARID1A RFXANK FOS SREBF2 JUNB CREB3L4 E2F8 INO80B MRTFA DVL2 ING1 MLLT11 EDN1 EGR1 DTX3L FOXM1 PDX1 RASL11A STAT1 NR4A1 IER2 THRAP3 RARB BCLAF1 TOP2A ISYNA1
	2.12893	1.11055e-05	GO:1902680 positive regulation of RNA biosynthetic process	56	1041	http://amigo.geneontology.org/amigo/term/GO:1902680	SIX5 CTCF STAT6 NPAS2 TEAD2 BCL10 MEPCE NFKBIA TGFB1 DCAF6 PSRC1 KLF6 MLXIPL SERTAD1 DYRK1B DHX9 FOSB CDK2 HNF1B SMARCC1 ZNF395 PBX3 ILK SIRT7 HMGN3 DDX39B ETV4 NFIB ENY2 RHOG ARID1A RFXANK FOS SREBF2 JUNB CREB3L4 E2F8 INO80B MRTFA DVL2 ING1 MLLT11 EDN1 EGR1 DTX3L FOXM1 PDX1 RASL11A STAT1 NR4A1 IER2 THRAP3 RARB BCLAF1 TOP2A ISYNA1
	2.04876	1.33498e-05	GO:0010557 positive regulation of macromolecule biosynthetic process	60	1159	http://amigo.geneontology.org/amigo/term/GO:0010557	SIX5 CTCF STAT6 NPAS2 TEAD2 BCL10 MEPCE NFKBIA TGFB1 DCAF6 PSRC1 KLF6 MLXIPL SERTAD1 DYRK1B DHX9 FOSB CDK2 HNF1B SMARCC1 ZNF395 PBX3 ILK SIRT7 HMGN3 DDX39B ETV4 NFIB ENY2 RHOG ARID1A RFXANK FOS SREBF2 JUNB CREB3L4 HNRNPA1 HNRNPD E2F8 INO80B MRTFA DVL2 ING1 MLLT11 EDN1 EGR1 DTX3L FOXM1 PDX1 RASL11A STAT1 NR4A1 RFC5 IER2 THRAP3 RARB BCLAF1 TOP2A ISYNA1 MPV17L2
	2.00083	7.02072e-06	GO:0006366 transcription by RNA polymerase II	68	1345	http://amigo.geneontology.org/amigo/term/GO:0006366	SIX5 CTCF STAT6 RARB TEAD2 ERF GTF2H5 PLK1 MEPCE NFKBIA ZBTB1 TGFB1 DCAF6 KLF6 MLXIPL SERTAD1 DHX9 IRF2BP1 PAF1 FOSB CDK2 NEDD8 SMARCC2 HNF1B TAF6L SMARCC1 ZNF395 PBX3 SIRT7 HMGN3 MXD3 ETV4 NFIB HNRNPA2B1 NUPR2 ZNF768 MNT RFXANK FOS SREBF2 MED20 JUNB CREB3L4 TSC22D3 ID1 E2F8 MRTFA CKS2 DVL2 ISYNA1 EDN1 EID1 EGR1 NRARP FOXM1 PDX1 STAT1 LEO1 NR4A1 CTDSP1 SDR16C5 LPIN1 SMIM7 IER2 THRAP3 LMCD1 NPAS2 …
	1.89226	2.07345e-05	GO:0031324 negative regulation of cellular metabolic process	70	1464	http://amigo.geneontology.org/amigo/term/GO:0031324	CARD8 SIX5 BCLAF1 CTCF STAT6 RARB PTPA FBXO5 XRCC1 ERF PLK1 MEPCE ZBTB1 EXOSC5 TGFB1 EXOSC10 MLXIPL ZFP36L1 DHX9 IRF2BP1 HNRNPL CDK2 SMARCC2 SMARCE1 HNF1B SMARCC1 FOXP1 SIRT7 HINT2 SLIT2 MXD3 NFIB HNRNPA2B1 TRIM21 HMGCR SRSF6 INSIG1 NUPR2 AUNIP DHCR24 CANT1 MNT RNF5 SREBF2 HNRNPA1 MCL1 ID1 HNRNPD E2F8 EDN1 EID1 EGR1 FKBP1B NRARP DTX3L DUSP16 ABCD1 CPTP CDKN2C FOXM1 PDX1 NR4A1 CTDSP1 SDR16C5 AXIN2…
	1.7948	2.07345e-05	GO:0009892 negative regulation of metabolic process	80	1764	http://amigo.geneontology.org/amigo/term/GO:0009892	CARD8 SIX5 BCLAF1 CTCF STAT6 OVOL2 RARB PTPA FBXO5 XRCC1 ERF PLK1 MEPCE ZBTB1 CHMP1A EXOSC5 TGFB1 EXOSC10 CLDN3 MLXIPL ZFP36L1 DHX9 IRF2BP1 HNRNPL H1-0 CDK2 SMARCC2 SMARCE1 HNF1B SMARCC1 FOXP1 SIRT7 SRSF3 HINT2 SLIT2 MXD3 NFIB HNRNPA2B1 TRIM21 HMGCR LSM7 SRSF6 INSIG1 NUPR2 AUNIP DHCR24 CANT1 MNT RNF5 SREBF2 HNRNPA1 MCL1 ID1 HNRNPD E2F8 CLP1 EDN1 EID1 EGR1 OAS1 FKBP1B NRARP DTX3L DUSP16 TRAIP ABCD…
	1.77351	9.74715e-06	GO:0031325 positive regulation of cellular metabolic process	89	1986	http://amigo.geneontology.org/amigo/term/GO:0031325	CARD8 SIX5 CTCF STAT6 NPAS2 PTPA TEAD2 XRCC1 BCL10 TNFRSF1B PLK1 MEPCE NFKBIA HSPA2 EXOSC5 TGFB1 DCAF6 PSRC1 KLF6 CLDN3 MLXIPL SERTAD1 ZFP36L1 DYRK1B DHX9 MLST8 IRF9 FOSB CDK2 LIPT2 PPP2R5D PPP1R10 HNF1B SMARCC1 ZNF395 PBX3 ILK SIRT7 HMGN3 AIMP2 DDX39B ETV4 NFIB ENY2 RHOG ARID1A TRIM21 HDGFL2 RFXANK FOS SREBF2 JUNB CREB3L4 MLYCD YEATS4 HNRNPA1 HNRNPD E2F8 INO80B MRTFA DVL2 ING1 MLLT11 EDN1 EGR1 R…
